# Supplementary material for: Essential Role for Endogenous siRNAs during Meiosis in Mouse Oocytes
Source: PLoS Genet. 2015 Feb 19;11(2):e1005013. doi: 10.1371/journal.pgen.1005013 (PMC4335007; doi:10.1371/journal.pgen.1005013)
Supplement: S1 Table — List of transcripts that were differentially expressed between Ago2 ADH and Ago2 null oocytes, using an FDR of 1%. A: Ago2 null group, B: Ago2ADH group. The fold change is calculated as base mean B/base mean A. Highlighted is the Ago2 transcript. (XLSX) [file pgen.1005013.s013.xlsx]

## Sheet: DESeq_sighits_AGO2-null_vs_cat-
Transcripts differentially expressed between Ago2ADH and Ago2 null oocytes (FDR=0.01)
ID	Gene symbol	baseMean	baseMeanA	baseMeanB	Fold change	log2 fold change	p value	padj
NM_173365	Gpr20	292.961	0	488.269	Inf	Inf	2.37459e-54	5.69071e-50
NM_010154	Erbb4	25.062	1.26479	40.9269	32.3586	5.01608	8.64044e-13	2.73691e-09
NM_009208	Slc4a3	107.701	13.868	170.257	12.2769	3.61788	2.80272e-32	3.35836e-28
NM_153178	Eif2c2 (Ago2)	456.504	275.266	577.329	2.09735	1.06857	1.57008e-15	1.25423e-11
NM_001271627	Runx2	232.805	150.45	287.709	1.91232	0.935322	2.28642e-06	0.00249064
NM_001146038	Runx2	231.819	150.45	286.065	1.90139	0.927057	2.96096e-06	0.00295664
NM_009820	Runx2	231.29	150.45	285.183	1.89553	0.922599	3.50161e-06	0.00322754
NM_175493	Gpr68	2015.51	1326.11	2475.11	1.86645	0.900298	5.2316e-13	2.5075e-09
NM_001271631	Runx2	208.692	138.186	255.696	1.85037	0.887811	1.12012e-06	0.00157904
NM_001177674	Gpr68	1914.22	1269.07	2344.32	1.84727	0.885393	7.96447e-13	2.73691e-09
NM_001177673	Gpr68	1914.01	1269.07	2343.97	1.847	0.885181	9.13634e-13	2.73691e-09
NM_001145920	Runx2	241.984	160.661	296.2	1.84363	0.882549	7.6735e-06	0.00612985
NM_001271630	Runx2	217.824	144.74	266.546	1.84155	0.880921	2.72074e-06	0.00283489
NM_019877	Copz2	934.98	687.422	1100.02	1.60021	0.678258	6.57939e-06	0.00543708
NM_010797	Mid1	1152.55	872.506	1339.24	1.53494	0.618183	7.77042e-07	0.00133013
NM_183151	Mid1	1186.55	905.301	1374.06	1.51779	0.601973	1.4573e-06	0.00194024
NM_031397	Bicc1	863.754	661.133	998.834	1.51079	0.595305	2.19463e-06	0.00249064
NM_001004153	AU018091	840.036	657.928	961.441	1.46132	0.547269	3.38501e-06	0.00322754
NM_017464	Nedd9	607.075	480.89	691.199	1.43733	0.523393	1.03602e-05	0.00800909
NM_001111324	Nedd9	605.695	480.89	688.898	1.43255	0.518583	1.25893e-05	0.00942817
NM_010661	Krt12	1289.19	1026.15	1464.54	1.42721	0.5132	5.26116e-07	0.000969875
NM_001105254	Gm10436	3834.99	3088.66	4332.54	1.40273	0.488233	1.8973e-06	0.00227344
NM_001163768	Tctex1d1	3057.09	2556.48	3390.83	1.32637	0.407478	1.36002e-05	0.00987663
NM_026102	Daam1	8382.48	7016.96	9292.83	1.32434	0.405272	1.01138e-06	0.00153564
NM_172464	Daam1	8365	7003.09	9272.94	1.32412	0.405035	1.02526e-06	0.00153564
NM_001039244	Gm7120	864.476	1071.73	726.308	0.677698	-0.561286	4.6296e-06	0.00396244
NM_001270792	Gm2042	1364.08	1713.66	1131.02	0.660002	-0.599457	1.00851e-08	2.01407e-05
NM_178657	Oog1	1362.6	1713.24	1128.84	0.658891	-0.601888	6.77799e-09	1.47668e-05
NM_008612	Mnat1	1050.79	1364.31	841.774	0.616996	-0.696667	1.32179e-09	3.16767e-06
NM_001111279	Wdfy1	2331.5	3175.82	1768.63	0.556904	-0.844498	1.45457e-13	8.71468e-10
NM_080285	Cttnbp2	144.671	206.159	103.679	0.50291	-0.991629	4.22678e-06	0.00375166
NM_019790	Tmeff2	124.48	217.158	62.694	0.288702	-1.79235	2.93014e-10	7.80232e-07
NM_025721	Spesp1	3.70271	8.85353	0.26884	0.0303654	-5.04143	1.88967e-06	0.00227344
